# Supplementary material for: Tranexamic Acid Attenuates the Progression of Posttraumatic Osteoarthritis in Mice
Source: PubMed Central journal article supplement — Am J Sports Med. 2024 Feb 2;52(3):766–78. doi: 10.1177/03635465231220855 (PMC10905980; doi:10.1177/03635465231220855), 2024-02-02
Supplement: sj-pdf-1-ajs-10.1177_03635465231220855.pdf [file sj-pdf-1-ajs-10.1177_03635465231220855.pdf]

# Tranexamic acid attenuates the progression of post-traumatic osteoarthritis in mice

## Appendix

**Table A1. Description of histological scoring approaches**

| Scoring system | OARSI                                                                                                     | Synovitis                                        | Bone erosion                               | Osteophyte                                                                                                                          |                                               |                                                                                      |
|----------------|-----------------------------------------------------------------------------------------------------------|--------------------------------------------------|--------------------------------------------|-------------------------------------------------------------------------------------------------------------------------------------|-----------------------------------------------|--------------------------------------------------------------------------------------|
| Reference      | (Glasson et al., 2010)                                                                                    | (Lewis et al., 2011)                             | (Jackson et al., 2014)                     | (Little et al., 2009)                                                                                                               |                                               |                                                                                      |
| Composition    | -                                                                                                         | <b>Enlargement of synovial lining cell layer</b> | <b>Density of cells in synovial stroma</b> | -                                                                                                                                   | <b>Size</b>                                   | <b>Maturity</b>                                                                      |
| <b>0</b>       | Normal                                                                                                    | 1-2 cell layers                                  | Normal                                     | None                                                                                                                                | None                                          | None                                                                                 |
| <b>0.5</b>     | Loss of Safranin-O without structural changes                                                             |                                                  |                                            |                                                                                                                                     |                                               |                                                                                      |
| <b>1</b>       | Small fibrillations without loss of cartilage                                                             | 3-4 cell layers                                  | Slightly increased                         | Partial thickness loss of cortical bone.                                                                                            | < 1 × the thickness as the adjacent cartilage | Predominantly cartilaginous                                                          |
| <b>2</b>       | Vertical clefts down to the layer immediately below the superficial layer and some loss of surface lamina | 5-9 cell layers                                  | Moderately increased                       | Focal complete loss of cortical bone - communication with marrow cavity at one small "vascular" communication site.                 | 1-3 × the thickness as the adjacent cartilage | Mixed cartilage and bone with active vascular invasion and endochondral ossification |
| <b>3</b>       | Vertical clefts/erosion to the calcified cartilage extending to < 25% of the articular surface            | ≥ 10 cell layers                                 | Greatly increased                          | Widespread complete loss of cortical bone - communication with marrow cavity at multiple sites or broad area loss of cortical bone. | > 3 × the thickness as the adjacent cartilage | Predominantly bone                                                                   |
| <b>4</b>       | Vertical clefts/erosion to the calcified cartilage extending to 25-50% of the articular surface           |                                                  |                                            |                                                                                                                                     |                                               |                                                                                      |
| <b>5</b>       | Vertical clefts/erosion to the calcified cartilage extending to 50-75% of the articular surface           |                                                  |                                            |                                                                                                                                     |                                               |                                                                                      |
| <b>6</b>       | Vertical clefts/erosion to the calcified cartilage extending > 75% of the articular surface               |                                                  |                                            |                                                                                                                                     |                                               |                                                                                      |

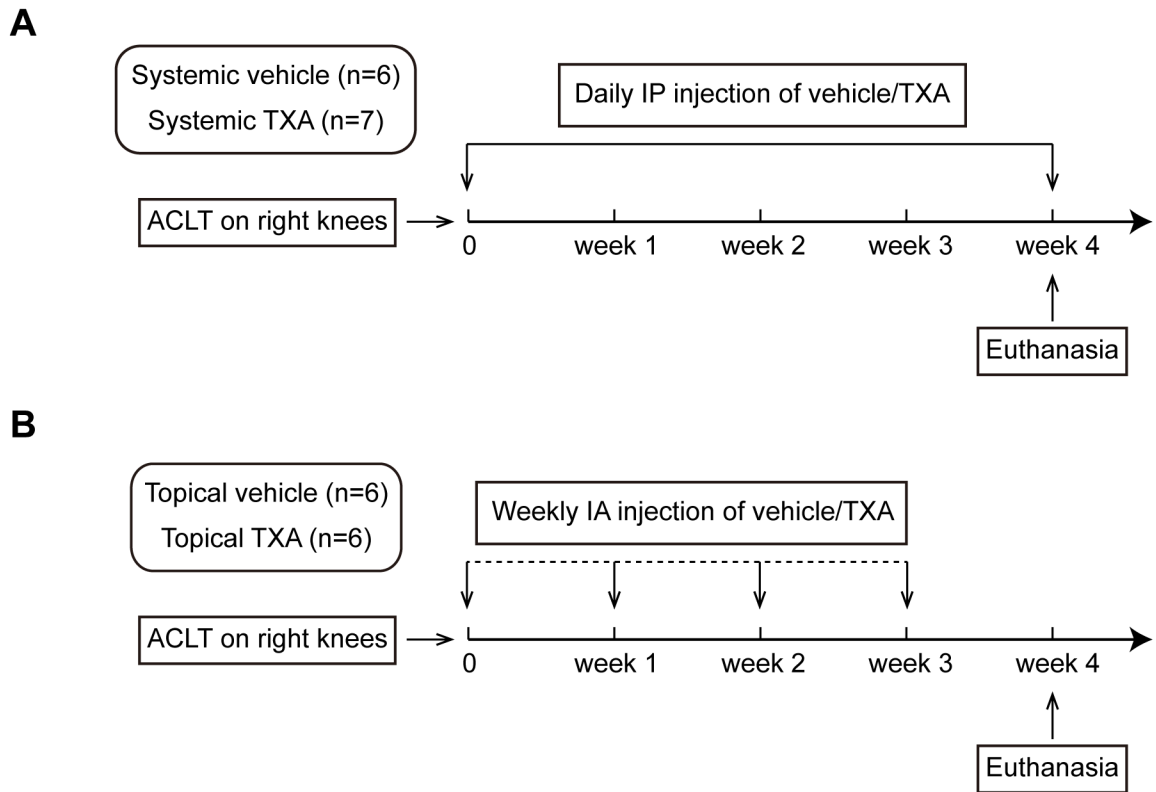

**Figure A1. Schematic of the experimental protocol. (A)** The experimental procedure of systemic treatment groups. **(B)** The experimental procedure of topical treatment groups. ACLT, anterior cruciate ligament transection; TXA, tranexamic acid; IP, intraperitoneal; IA, intra-articular.

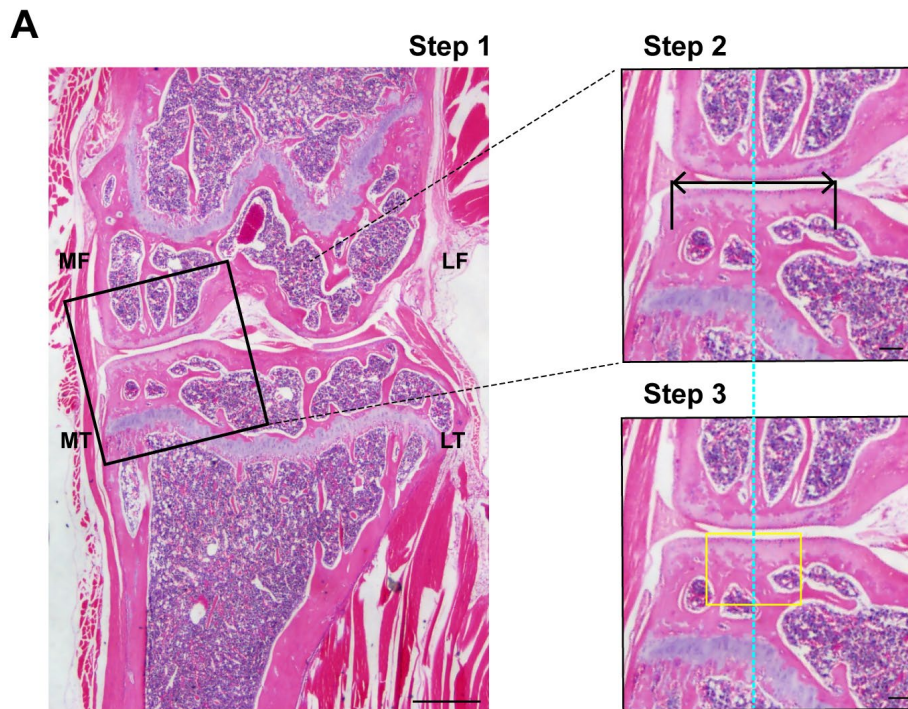

**Figure A2. Diagram illustrating the measurements of cartilage thickness. A)** Step1: Locating the medial joint compartment at low magnification (scale bar = 500 $\mu$ m). MT, medial tibia; MF, medial femur; LTP, lateral tibia; LFC, lateral femur; Step 2: Identifying the flat region of medial tibial plateau at higher magnification, then positioning the midline perpendicular to the tibial plateau (scale bar = 100 $\mu$ m). The double-headed black arrows indicate the flat region, and the blue dotted line represents the midline; Step 3: Defining the target area. The yellow box (400  $\mu$ m  $\times$  300  $\mu$ m) indicates the region of interest, which is centered on the midline.

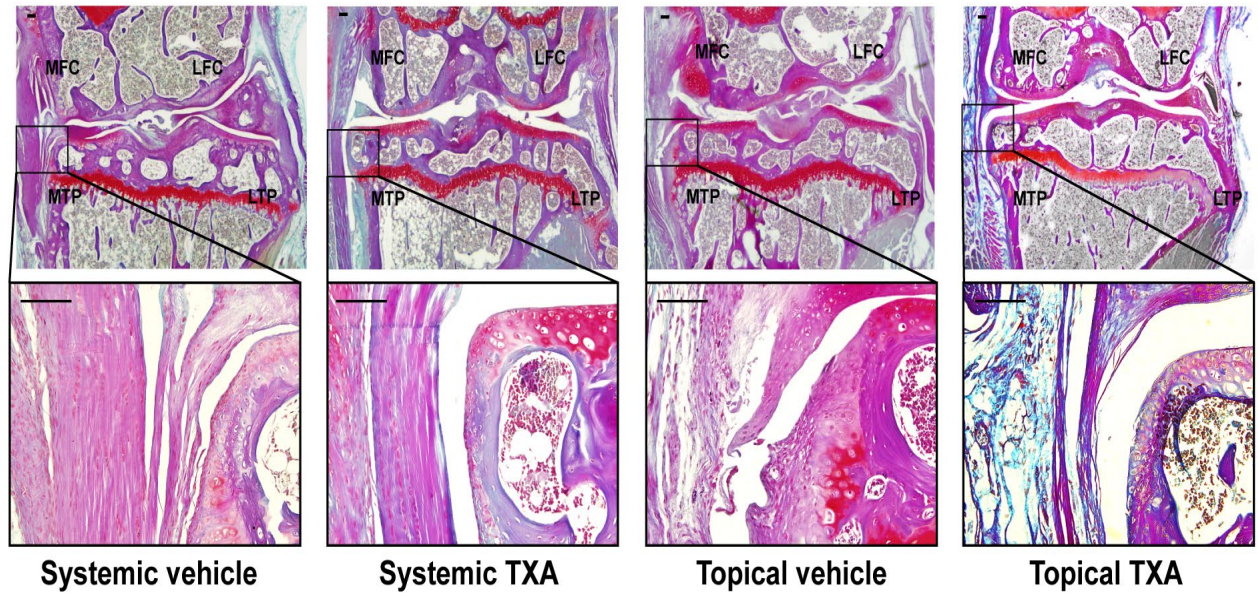

**Figure A3.** BIC staining showing the medial tibial synovium of the operated OA knee at 4 weeks after ACLT (scale bar = 100  $\mu$ m). MFC, medial femoral condyle; MTP, medial tibial plateau. LFC, lateral femoral condyle; LTP, lateral tibial plateau.

## REFERENCES

- Glasson, S. S., Chambers, M. G., Van Den Berg, W. B., & Little, C. B. (2010). The OARSI histopathology initiative - recommendations for histological assessments of osteoarthritis in the mouse. *Osteoarthritis and Cartilage*, *18 Suppl 3*, S17-S23. <https://doi.org/10.1016/j.joca.2010.05.025>
- Jackson, M. T., Moradi, B., Zaki, S., Smith, M. M., McCracken, S., Smith, S. M., . . . Little, C. B. (2014). Depletion of protease-activated receptor 2 but not protease-activated receptor 1 may confer protection against osteoarthritis in mice through extracartilaginous mechanisms. *Arthritis & Rheumatology*, *66*(12), 3337-3348. <https://doi.org/10.1002/art.38876>
- Lewis, J. S., Hembree, W. C., Furman, B. D., Tippets, L., Cattell, D., Huebner, J. L., . . . Olson, S. A. (2011). Acute joint pathology and synovial inflammation is associated with increased intra-articular fracture severity in the mouse knee. *Osteoarthritis and Cartilage*, *19*(7), 864-873. <https://doi.org/10.1016/j.joca.2011.04.011>
- Little, C. B., Barai, A., Burkhardt, D., Smith, S. M., Fosang, A. J., Werb, Z., . . . Thompson, E. W. (2009). Matrix metalloproteinase 13-deficient mice are resistant to osteoarthritic cartilage erosion but not chondrocyte hypertrophy or osteophyte development. *Arthritis and Rheumatism*, *60*(12), 3723-3733. <https://doi.org/10.1002/art.25002>
